# Supplementary material for: Multi-centennial climate change in a warming world beyond 2100
Source: Copernicus journal article supplement (doi:10.5194/egusphere-2024-3377), 2024-11-27
Supplement: Supplementary file 1 [file egusphere-2024-3377-supplement.pdf]

*Supplement of*

## **Multi-centennial climate change in a warming world beyond 2100**

Sun-Seon Lee<sup>1,2\*</sup>, Sahil Sharma<sup>1,2</sup>, Nan Rosenbloom<sup>3</sup>, Keith B. Rodgers<sup>4\*</sup>, Ji-Eun Kim<sup>1,2</sup>, Eun Young Kwon<sup>1,2</sup>, Christian L.E. Franzke<sup>1,2</sup>, In-Won Kim<sup>1,2</sup>, M. G. Sreeush<sup>5</sup>, and Karl Stein<sup>1,2</sup>

<sup>1</sup>Center for Climate Physics, Institute for Basic Science, Busan, Republic of Korea

<sup>2</sup>Pusan National University, Busan, Republic of Korea

<sup>3</sup>National Center for Atmospheric Research, Boulder, CO, USA

<sup>4</sup>WPI-Advanced Institute for Marine Ecosystem Change, Tohoku University, Sendai, Japan

<sup>5</sup>Alfred Wegener Institute, Helmholtz Centre for Polar and Marine Research, Am Handelshafen 12, 27570 Bremerhaven, Germany

*Correspondence to:* Sun-Seon Lee ([sunseonlee@pusan.ac.kr](mailto:sunseonlee@pusan.ac.kr)) and Keith B. Rodgers ([keith.rodgers.b2@tohoku.ac.jp](mailto:keith.rodgers.b2@tohoku.ac.jp))

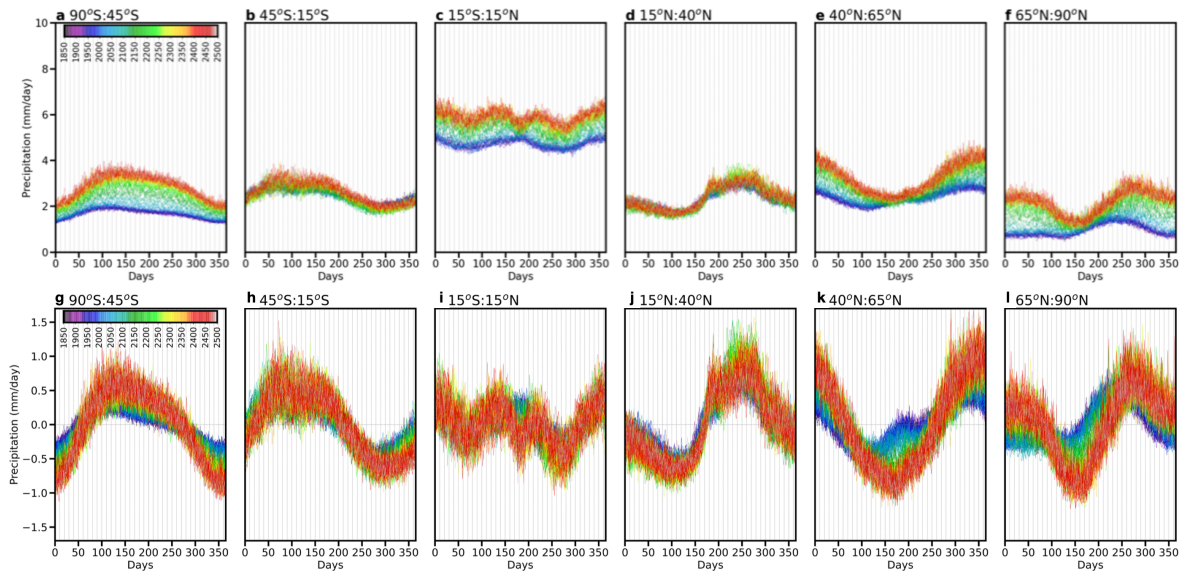

**Figure S1: Seasonal cycle of daily precipitation ( $\text{mm day}^{-1}$ ) along latitudinal bands. (a, g)  $90^{\circ}\text{S}-45^{\circ}\text{S}$ , (b, h)  $45^{\circ}\text{S}-15^{\circ}\text{S}$ , (c, i)  $15^{\circ}\text{S}-15^{\circ}\text{N}$ , (d, j)  $15^{\circ}\text{N}-40^{\circ}\text{N}$ , (e, k)  $40^{\circ}\text{N}-65^{\circ}\text{N}$ , and (f, l)  $65^{\circ}\text{N}-90^{\circ}\text{N}$ . Upper panels show daily mean precipitation in 5-year intervals and low panels show daily precipitation anomaly obtained by removing the annual mean from each year.**

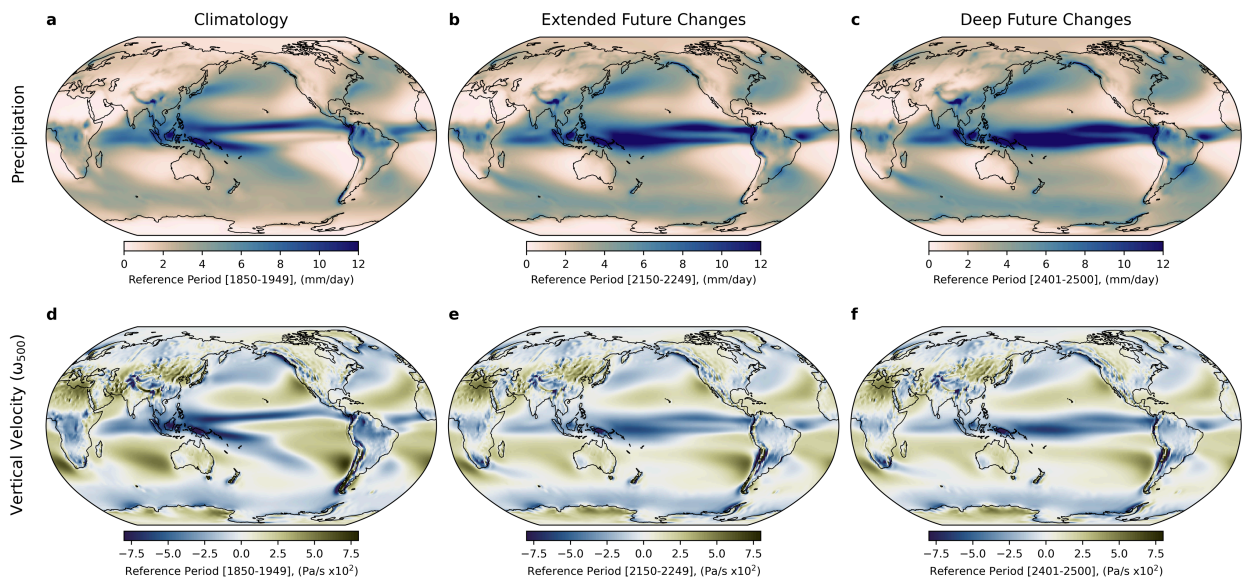

**Figure S2: Reference climatology of precipitation ( $\text{mm day}^{-1}$ ; upper panels) and 500 hPa vertical p-velocity ( $\text{Pa s}^{-1} \times 10^2$ ; lower panels). (a, d) Period spanning 1850-1949, (b, e) period spanning 2150-2249, and (c, f) period spanning 2401-2500.**

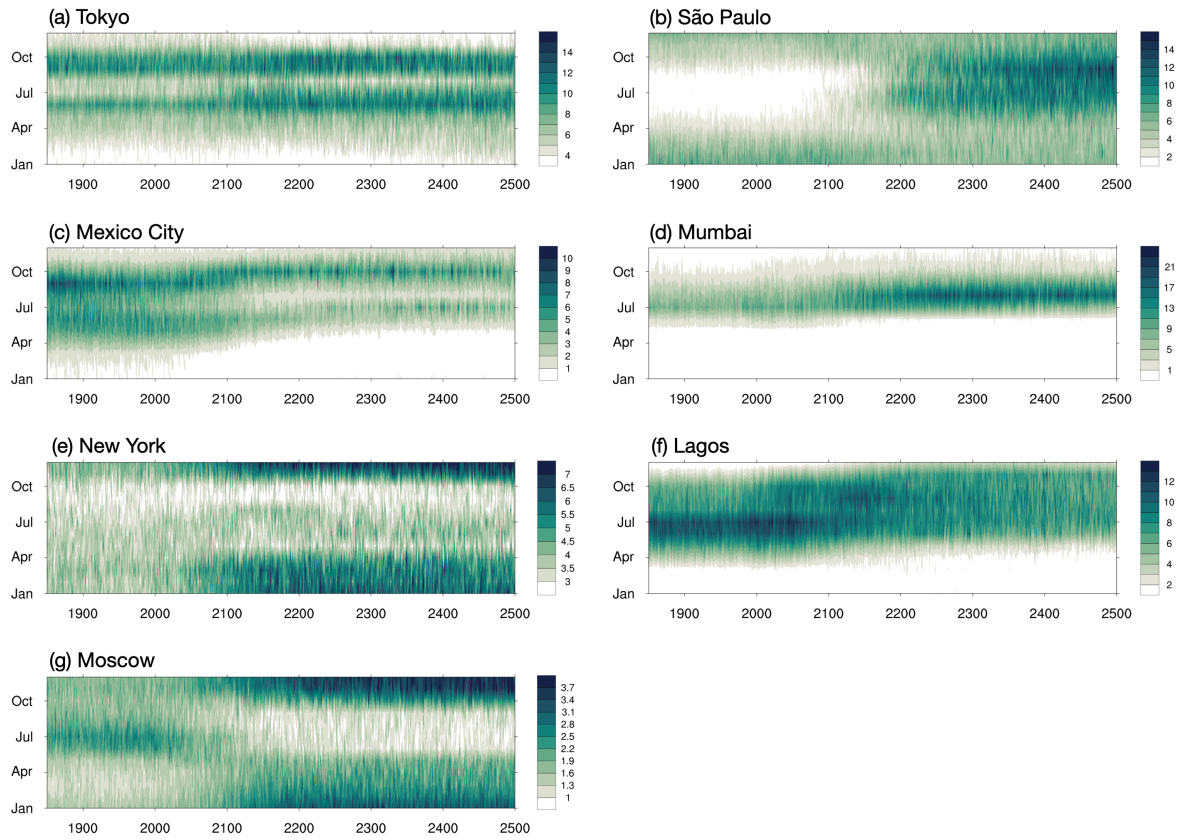

**Figure S3: Monthly precipitation (mm day<sup>-1</sup>) in (a) Tokyo (139.7°E, 35.7°N), (b) São Paulo (313.4°E, 23.6°S), (c) Mexico City (260.7°E, 19.4°N), (d) Mumbai (72.9°E, 19.1°N), (e) New York (286.0°E, 40.7°N), (f) Lagos (3.4°E, 6.5°N), and (g) Moscow (37.6°E, 55.8°N).**



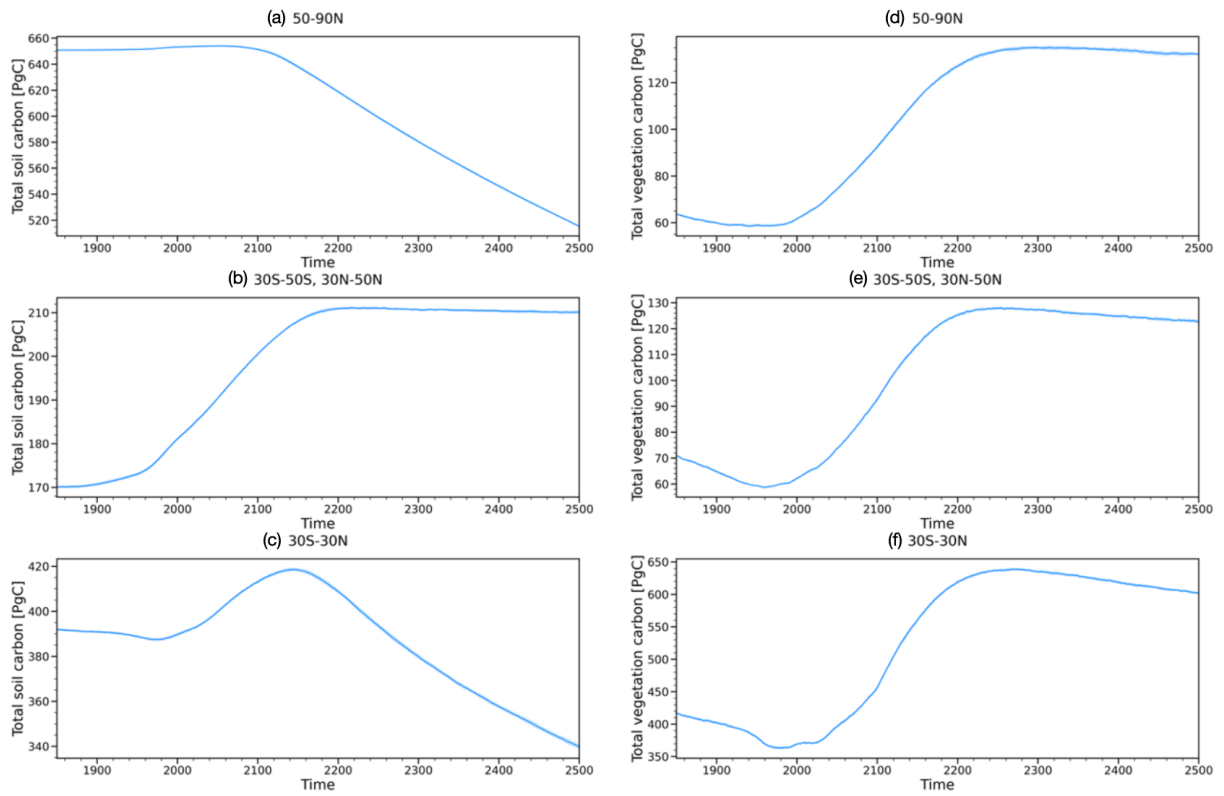

**Figure S4: Time series of total soil carbon and total vegetation carbon. Total soil carbon (PgC) integrated over (a) 50°N-90°N, (b) 30°S-50°S and 30°N-50°N, and (c) 30°S-30°N. Total vegetation carbon (PgC) integrated over (d) 50°N-90°N, (e) 30°S-50°S and 30°N-50°N, and (f) 30°S-30°N.**

Supplementary Table 1 Same as Table 1 except for integrated over 30°S-30°N.

| <i>30°S-30°N</i><br>DIC<br>PO <sub>4</sub> | F <sub>100</sub><br>(PgC yr <sup>-1</sup> )<br>(TmolPO <sub>4</sub> yr <sup>-1</sup> ) | F <sub>1000</sub><br>(PgC yr <sup>-1</sup> )<br>(TmolPO <sub>4</sub> yr <sup>-1</sup> ) | Transfer<br>efficiency | Mesopelagic Accumulation<br>(Remineralization source)<br>(PgC yr <sup>-1</sup> )<br>(TmolPO <sub>4</sub> yr <sup>-1</sup> ) |
|--------------------------------------------|----------------------------------------------------------------------------------------|-----------------------------------------------------------------------------------------|------------------------|-----------------------------------------------------------------------------------------------------------------------------|
| 1890s                                      | 3.971<br>2.534                                                                         | 0.602<br>0.394                                                                          | 0.152<br>0.155         | 3.369<br>2.141                                                                                                              |
| 1990s                                      | 3.927 (-1.1%)<br>2.520 (-0.6%)                                                         | 0.612 (+1.7%)<br>0.398 (+1.1%)                                                          | 0.156<br>0.158         | 3.315 (-1.6%)<br>2.122 (-13.4%)                                                                                             |
| 2090s                                      | 3.809 (-4.1%)<br>2.240 (-11.6%)                                                        | 0.644 (+7.0%)<br>0.391 (-0.6%)                                                          | 0.169<br>0.175         | 3.165 (-6.1%)<br>1.849 (-13.6%)                                                                                             |
| 2190s                                      | 2.968 (-25.3%)<br>1.642 (-35.2%)                                                       | 0.529 (-12.1%)<br>0.300 (-23.9%)                                                        | 0.178<br>0.182         | 2.439 (-27.6%)<br>1.342 (-37.3%)                                                                                            |
| 2290s                                      | 2.555 (-35.7%)<br>1.393 (-45.0%)                                                       | 0.472 (-21.6%)<br>0.262 (-33.4%)                                                        | 0.185<br>0.188         | 2.083 (-38.2%)<br>1.131 (-47.2%)                                                                                            |
| 2390s                                      | 2.334 (-41.2%)<br>1.288 (-49.2%)                                                       | 0.445 (-26.2%)<br>0.245 (-37.8%)                                                        | 0.188<br>0.190         | 1.890 (-43.9%)<br>1.043 (-51.3%)                                                                                            |
| 2490s                                      | 2.256 (-43.2%)<br>1.221 (-51.8%)                                                       | 0.424 (-29.5%)<br>0.233 (-40.8%)                                                        | 0.188<br>0.191         | 1.832 (-45.6%)<br>0.988 (-53.8%)                                                                                            |

Supplementary Table 2 Same as Table 1 except for integrated over 90°S-60°S.

| 90°S-60°S<br>DIC<br>PO <sub>4</sub> | F <sub>100</sub><br>(PgC yr <sup>-1</sup> )<br>(TmolPO <sub>4</sub> yr <sup>-1</sup> ) | F <sub>1000</sub><br>(PgC yr <sup>-1</sup> )<br>(TmolPO <sub>4</sub> yr <sup>-1</sup> ) | Transfer<br>efficiency | Mesopelagic Accumulation<br>(Remineralization source)<br>(PgC yr <sup>-1</sup> )<br>(TmolPO <sub>4</sub> yr <sup>-1</sup> ) |
|-------------------------------------|----------------------------------------------------------------------------------------|-----------------------------------------------------------------------------------------|------------------------|-----------------------------------------------------------------------------------------------------------------------------|
| 1890s                               | 0.1653<br>0.1177                                                                       | 0.0149<br>0.0106                                                                        | 0.0900<br>0.0901       | 0.1504<br>0.1071                                                                                                            |
| 1990s                               | 0.1871 (+13.2%)<br>0.1332 (+13.0%)                                                     | 0.0167 (+14.1%)<br>0.0121 (+14.1%)                                                      | 0.0908<br>0.0908       | 0.1701 (+13.1%)<br>0.1211 (+13.1%)                                                                                          |
| 2090s                               | 0.2423 (+46.6%)<br>0.1726 (+46.6%)                                                     | 0.0228 (+53.5%)<br>0.0163 (+53.5%)                                                      | 0.0943<br>0.0943       | 0.2195 (+45.9%)<br>0.1563 (+45.9%)                                                                                          |
| 2190s                               | 0.3061 (+85.2%)<br>0.2179 (+85.1%)                                                     | 0.0336 (+125.5%)<br>0.0205 (+93.7%)                                                     | 0.1096<br>0.0942       | 0.2773 (+84.4%)<br>0.1974 (+84.3%)                                                                                          |
| 2290s                               | 0.3687 (+123.0%)<br>0.2625 (+123.0%)                                                   | 0.0336 (+125.5%)<br>0.0239 (+125.5%)                                                    | 0.0910<br>0.0910       | 0.3351 (+122.8%)<br>0.2386 (+122.8%)                                                                                        |
| 2390s                               | 0.3906 (+136.3%)<br>0.2780 (+136.0%)                                                   | 0.0351 (+135.7%)<br>0.0250 (+135.7%)                                                    | 0.0898<br>0.0899       | 0.3555 (+136.4%)<br>0.2530 (+136.2%)                                                                                        |
| 2490s                               | 0.3980 (+140.8%)<br>0.2833 (+140.7%)                                                   | 0.0354 (+138.2%)<br>0.0252 (+138.1%)                                                    | 0.0890<br>0.0891       | 0.3627 (+141.2%)<br>0.2581 (+141.0%)                                                                                        |

**Supplementary Table 3** The centennial-timescale ensemble-mean export ratio ( $E_{F100/NPP}$ ), given as the ratio of export at 100 m ( $F_{100}$ ) to depth-integrated NPP. For each variable, averages are conducted over 10 years, and changes relative to the 1890s are given in parentheses.

| <b>Export Ratio</b><br>[ $E_{F100/NPP}$ ]<br>$F_{100}$ (PgC yr <sup>-1</sup> )<br>NPP (PgC yr <sup>-1</sup> ) | Global integral                                         | 30°S-30°N integral                                      | 90°S-30°S integral                                     | 30°N-90°N integral                                     |
|---------------------------------------------------------------------------------------------------------------|---------------------------------------------------------|---------------------------------------------------------|--------------------------------------------------------|--------------------------------------------------------|
| 1890s                                                                                                         | <b>0.145</b><br>6.98<br>48.3                            | <b>0.129</b><br>3.97<br>30.7                            | <b>0.167</b><br>1.70<br>10.2                           | <b>0.178</b><br>1.32<br>7.4                            |
| 1990s                                                                                                         | <b>0.145 (+0.0%)</b><br>7.08 (+1.4%)<br>48.8 (+1.0%)    | <b>0.129 (+0.0%)</b><br>3.98 (+0.2%)<br>30.8 (+0.3%)    | <b>0.168 (+0.6%)</b><br>1.76 (+3.8%)<br>10.5 (+2.9%)   | <b>0.176 (-1.1%)</b><br>1.34 (+1.7%)<br>7.6 (+2.7%)    |
| 2090s                                                                                                         | <b>0.139 (-4.1%)</b><br>6.91 (-1.0%)<br>49.8 (+3.1%)    | <b>0.122 (-5.4%)</b><br>3.81 (-4.1%)<br>31.3 (+2.0%)    | <b>0.172 (+3.0%)</b><br>2.00 (+17.6%)<br>11.6 (+13.7%) | <b>0.159 (-10.7%)</b><br>1.10 (-16.5%)<br>6.9 (-6.7%)  |
| 2190s                                                                                                         | <b>0.127 (-12.4%)</b><br>5.85 (-16.2%)<br>46.1 (-4.6%)  | <b>0.107 (-17.0%)</b><br>2.97 (-25.2%)<br>27.8 (-9.4%)  | <b>0.166 (-0.6%)</b><br>2.07 (+21.8%)<br>12.5 (+22.5%) | <b>0.141 (-20.8%)</b><br>0.82 (-37.9%)<br>5.8 (-21.6%) |
| 2290s                                                                                                         | <b>0.124 (-14.5%)</b><br>5.43 (-22.2%)<br>43.9 (-9.1%)  | <b>0.101 (-21.7%)</b><br>2.55 (-35.7%)<br>25.2 (-17.9%) | <b>0.163 (-2.4%)</b><br>2.13 (+25.5%)<br>13.1 (+28.4%) | <b>0.132 (-25.8%)</b><br>0.74 (-43.7%)<br>5.6 (-24.3%) |
| 2390s                                                                                                         | <b>0.122 (-15.9%)</b><br>5.21 (-25.4%)<br>42.6 (-11.8%) | <b>0.099 (-23.3%)</b><br>2.37 (-40.2%)<br>24.0 (-21.8%) | <b>0.161 (-3.6%)</b><br>2.14 (+25.9%)<br>13.3 (+30.4%) | <b>0.129 (-27.5%)</b><br>0.69 (-47.3%)<br>5.4 (-27.0%) |
| 2490s                                                                                                         | <b>0.121 (-16.6%)</b><br>5.06 (-27.6%)<br>41.7 (-13.7%) | <b>0.098 (-24.0%)</b><br>2.26 (-43.2%)<br>23.1 (-24.8%) | <b>0.159 (-4.8%)</b><br>2.13 (+25.3%)<br>13.4 (+31.4%) | <b>0.128 (-28.1%)</b><br>0.67 (-49.3%)<br>5.2 (-29.7%) |
